# Supplementary material
Source: ML conference proceedings conference paper supplement (https://openaccess.thecvf.com/content/CVPR2023/html/Zhou_Exploring_Motion_Ambiguity_CVPR_2023_paper.html)
Supplement: Supplementary file 1 [file Zhou_Exploring_Motion_Ambiguity_CVPR_2023_supplemental.zip]

Archive with 2 entries (2 files):
- comparison.mp4
- CVPR2023_ID5337_supp_cameraReady.pdf
